# Supplementary material for: Single step derivatization with CF3 enone of thiophene at ambient temperature to determine propellant grade hydrazines: a study by GC and GC-MS
Source: Royal Society of Chemistry journal article supplement (doi:10.1039/c4an01648c), 2014-11-11
Supplement: c4an01648c1.pdf [file c4an01648c1.pdf]

**“Single Step derivatization with CF<sub>3</sub> enone of Thiophene at Ambient temperature to determine Propellant Grade Hydrazines: A Study by GC & GC-MS”**

by

*Selvakumar Subramanian\*<sup>ab</sup>, Somanathan Narayanasastri \*<sup>b</sup> and Audisesha Reddy Kami Reddy<sup>a</sup>*

<sup>a</sup>*Chemical Testing Lab, Solid Propellant Space Booster Plant, SDSC-SHAR Centre, Indian Space Research Organization (ISRO), Sriharikota 524124, Andhra Pradesh, India  
Tel.: +91-8623-223013; fax: +91-8623-225154  
E-mail: selvakumar.s@shar.gov.in , kumarreka@hotmail.com*

<sup>b</sup>*Polymer Division, Central Leather Research Institute (CLRI), Council of Scientific and Industrial Research (CSIR), Adyar, Chennai 600020, Tamil Nadu, India.  
Tel.: +91-44-24437189; E-mail: nsomanathan@rediffmail.com*

\* To whom correspondence should be addressed.

### **GC Column Selection procedure for analysis:**

Scouting experiments were performed for the selection of column with several test conditions. GC packed columns tried were SE 30-10%-Dimethylpolysiloxane on Chromosorb-WHP-60/80, 25% Carbowax-20M on Chromosorb-WHP-70/80, 10% UCW-98 (Methylvinylpolysiloxane)-Chromosorb-WHP - 80/100, 30 % Theed on Chromosorb-WHP - 30/60, 25% PEG 400 on Anakrom AB -70/80. SE-30 column is found to be suitable for present study as it is superior in quality with good thermal stability. Isothermal and temperature programming methods were tried to resolve the peaks. Temperature programming was found to be better option for good resolution and quantification. Experimental conditions thus optimized and standardized are given in manuscript. System suitability check (reproducibility check) has been performed using SE30 column and it is found that relative standard deviation (RSD) for five injections of CF<sub>3</sub> enone is less than 1 %. Areas obtained from main peaks of derivatives of hydrazine, MMH and UH25 were also taken for reproducibility check and RSD for five determinations of each individual derivative peaks was found to be less than 1 %.

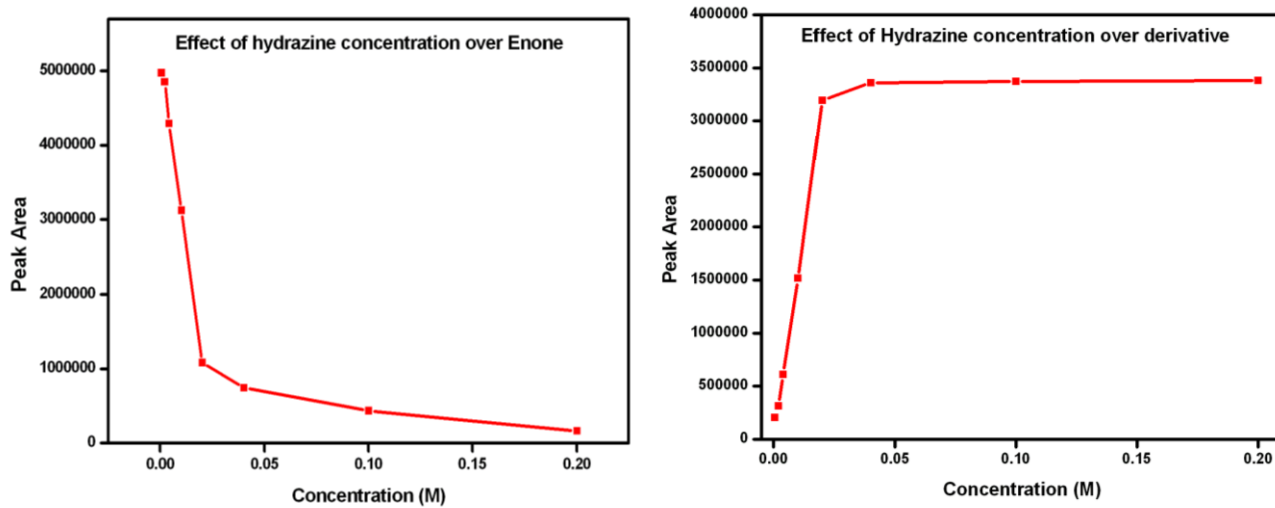

**Fig. S1.** Effect of hydrazine concentration over area of  $\text{CF}_3$  enone (A) and its derivative (B)

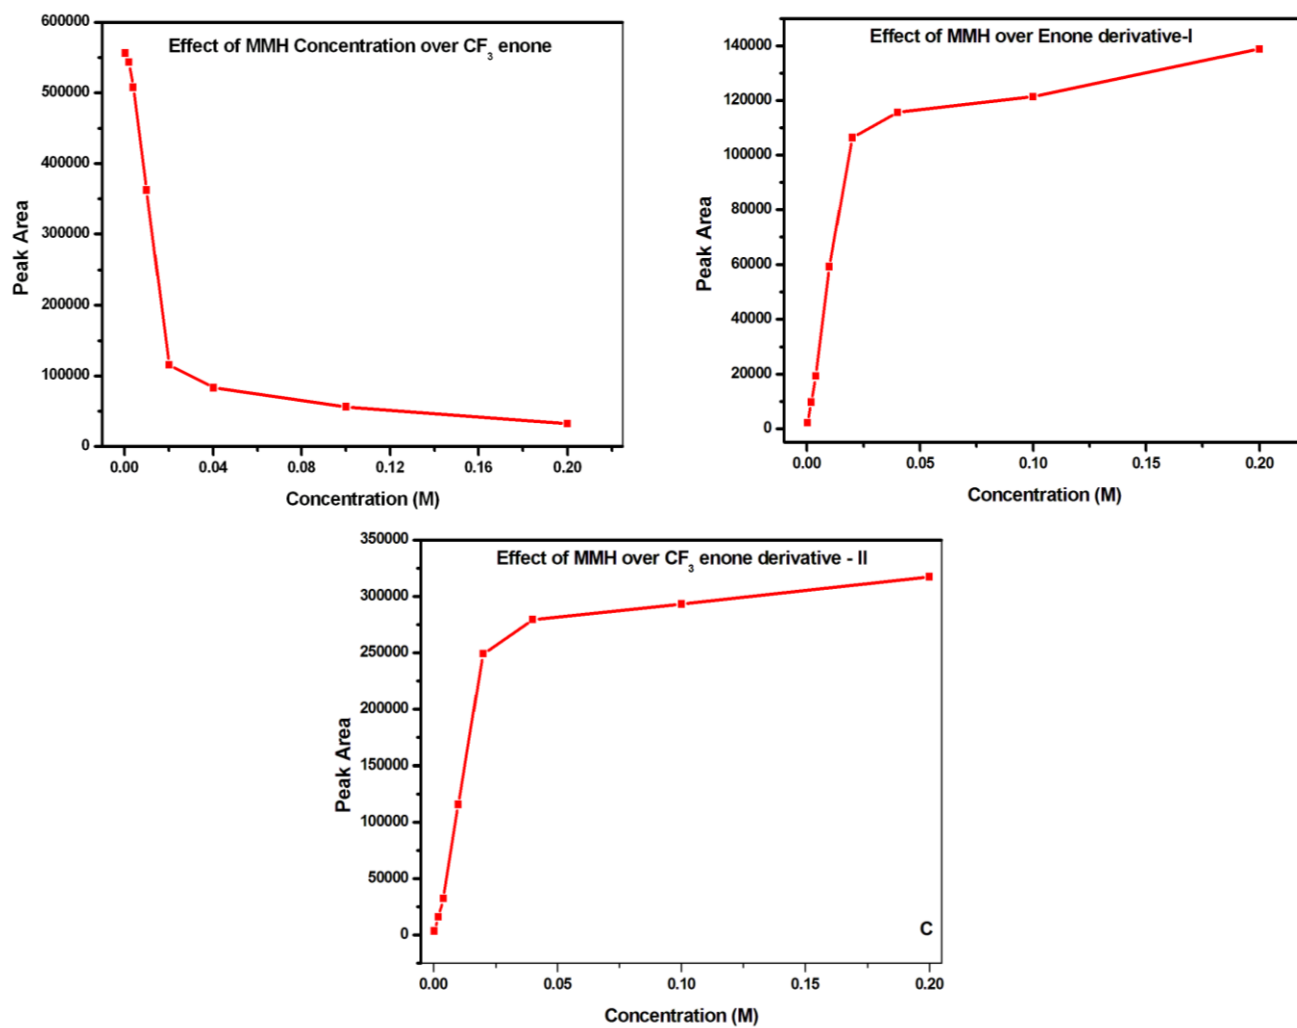

**Fig.S2** Effect of MMH concentration over peak area of CF<sub>3</sub> enone (A) and CF<sub>3</sub> enone derivative-I –Pyrazoline-I (B) CF<sub>3</sub> enone derivative-II –Pyrazoline-II (C)

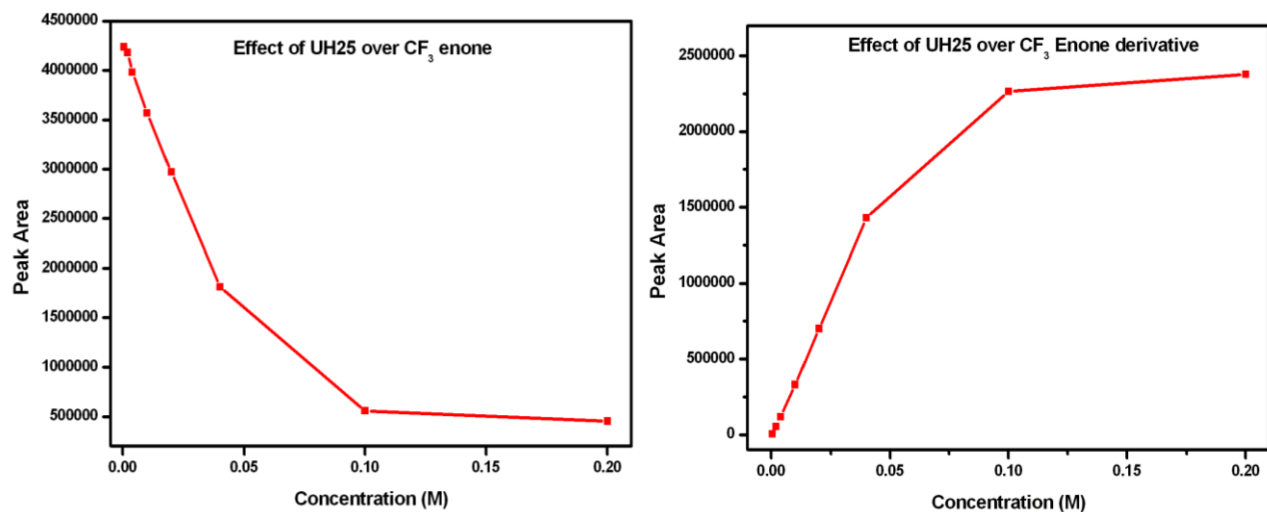

**Fig.S3** Effect of UH25 concentration over peak area of CF<sub>3</sub> enone (A) and UH25 derivative of CF<sub>3</sub> enone (B)

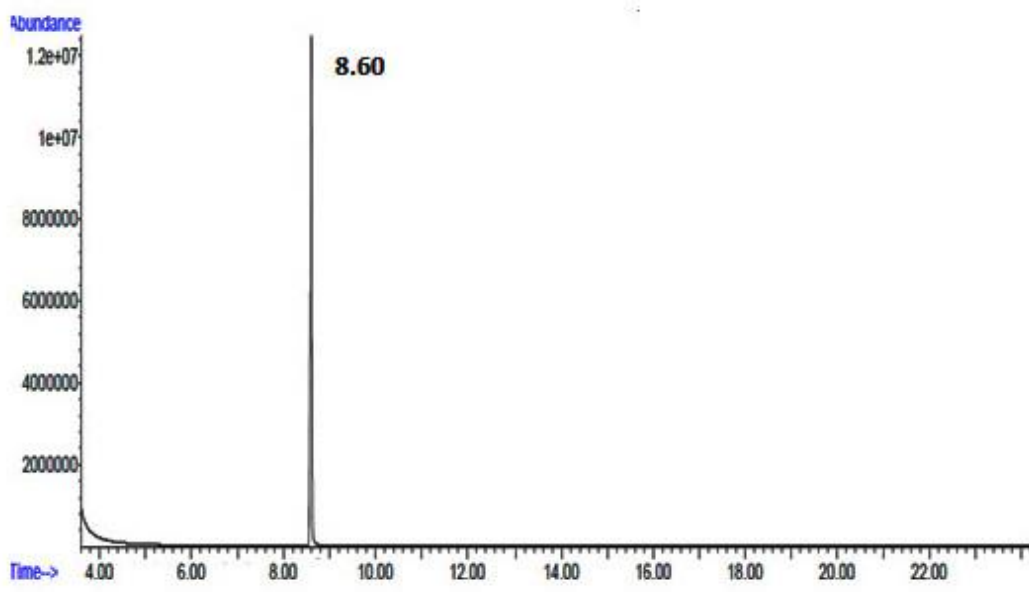

Fig. S4 Chromatogram for CF<sub>3</sub> Enone

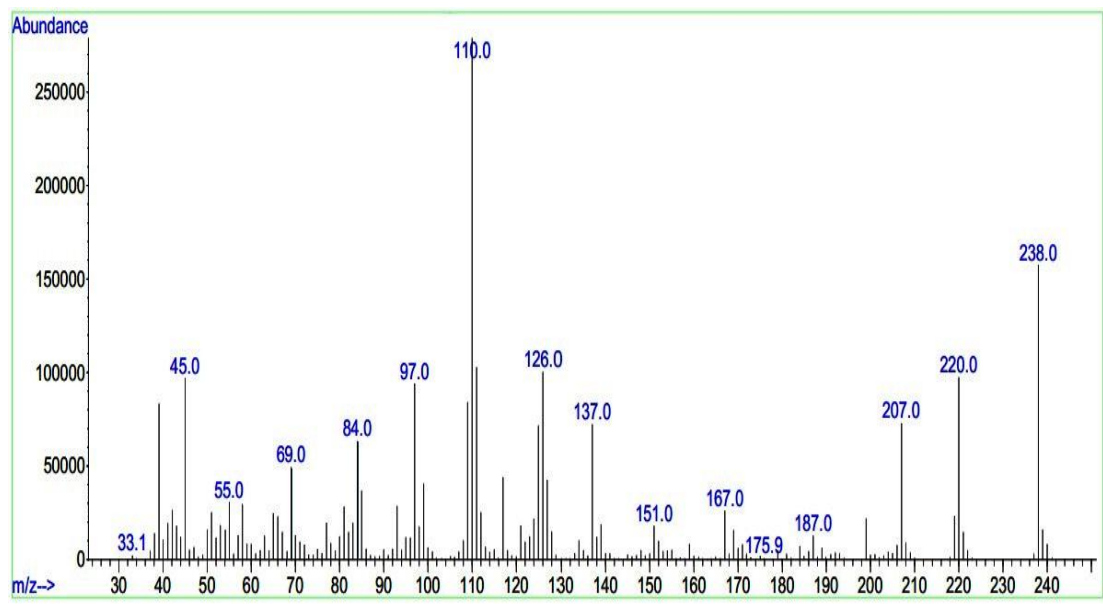

Fig.S5 Mass Spectra for the peak eluted at 14.06 min. (Pyrazolidine)

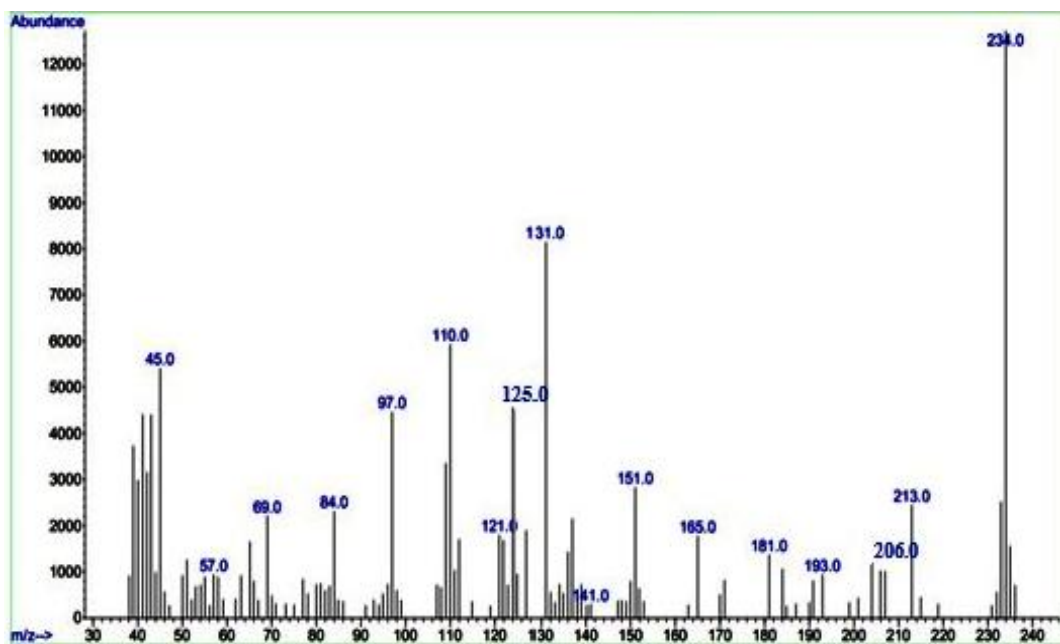

**Fig.S6** Mass Spectra for the peak eluted at 10.41 min. (Pyrazoline I – MMH Derivative-I)

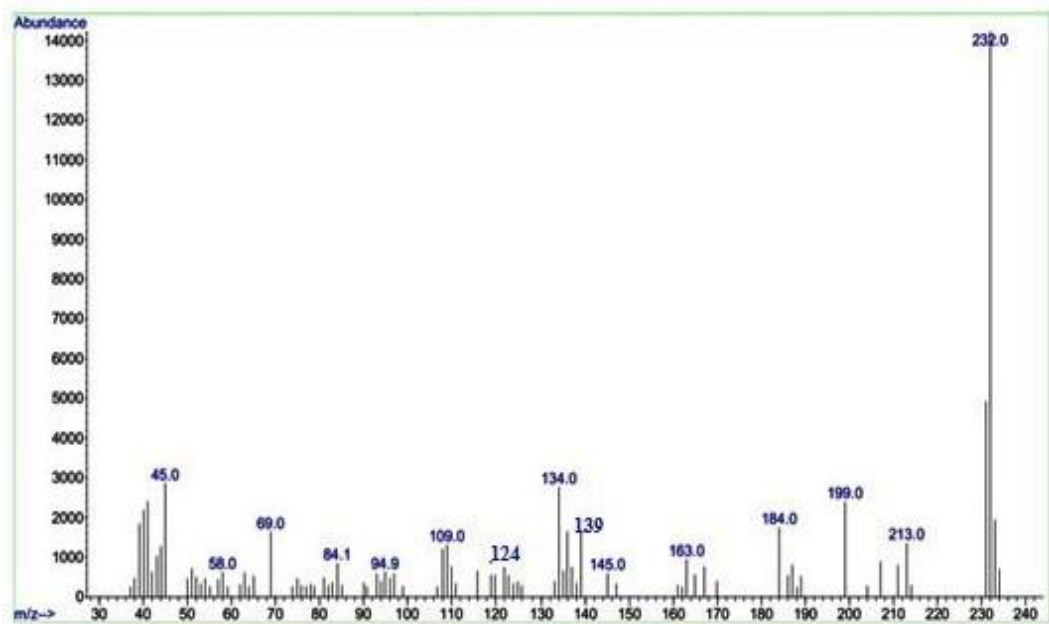

**Fig.S7** Mass Spectra for the peak eluted at 13.91 min. (Pyrazole- I – MMH Derivative-III )

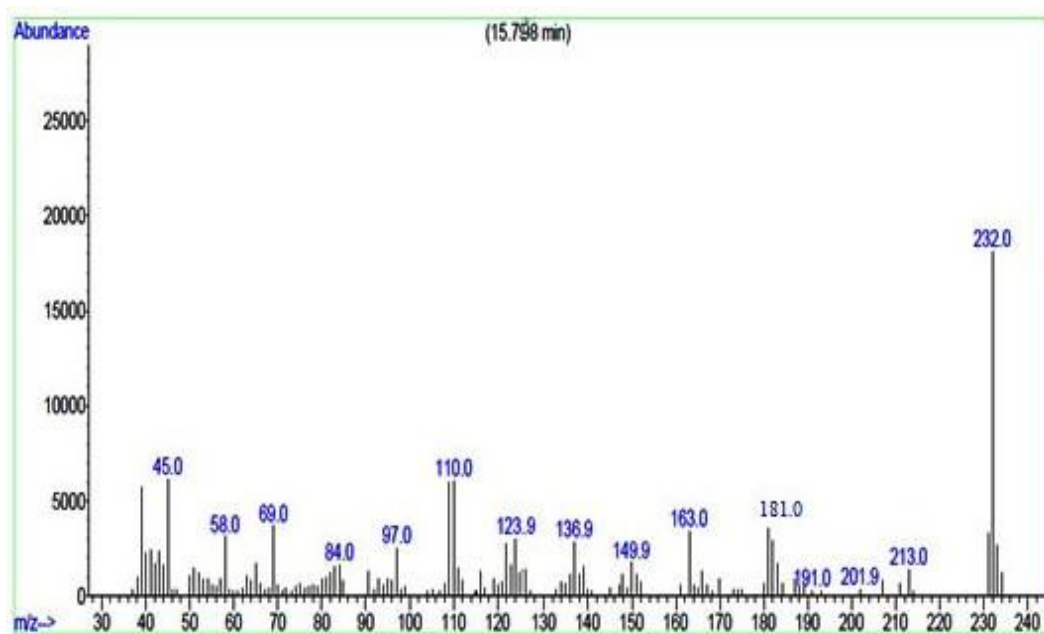

**Fig.S8** Mass Spectra for the peak eluted at 15.80 min. (Pyrazole- II - MMH Derivative-IV)

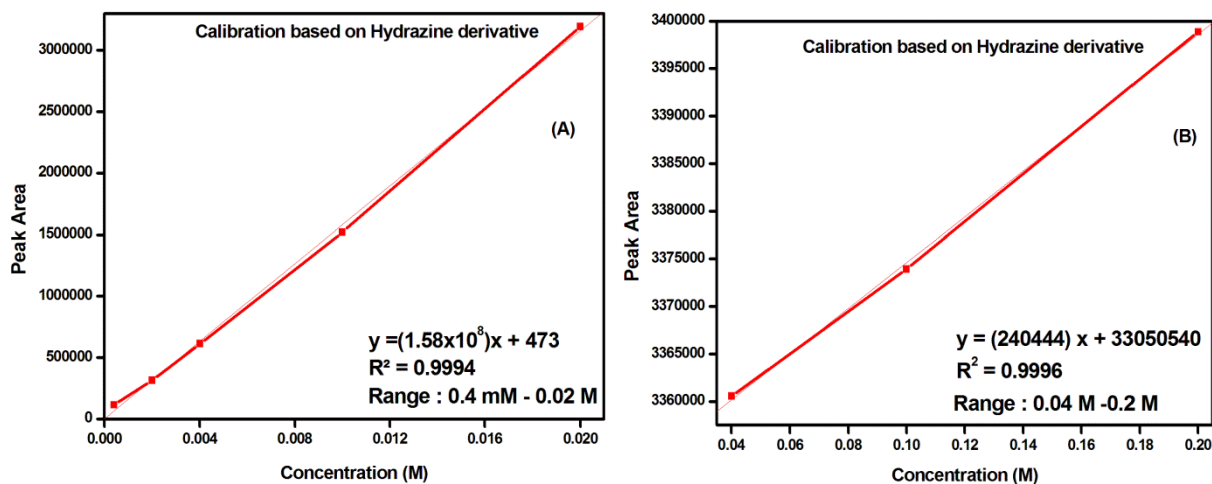

**Fig.S9.** Calibration graphs for the determination of hydrazine based on Pyrazolidine (hydrazine derivative) in the concentration range of 0.4 mM-0.02M (A) and 0.04 M – 0.2 M (B).



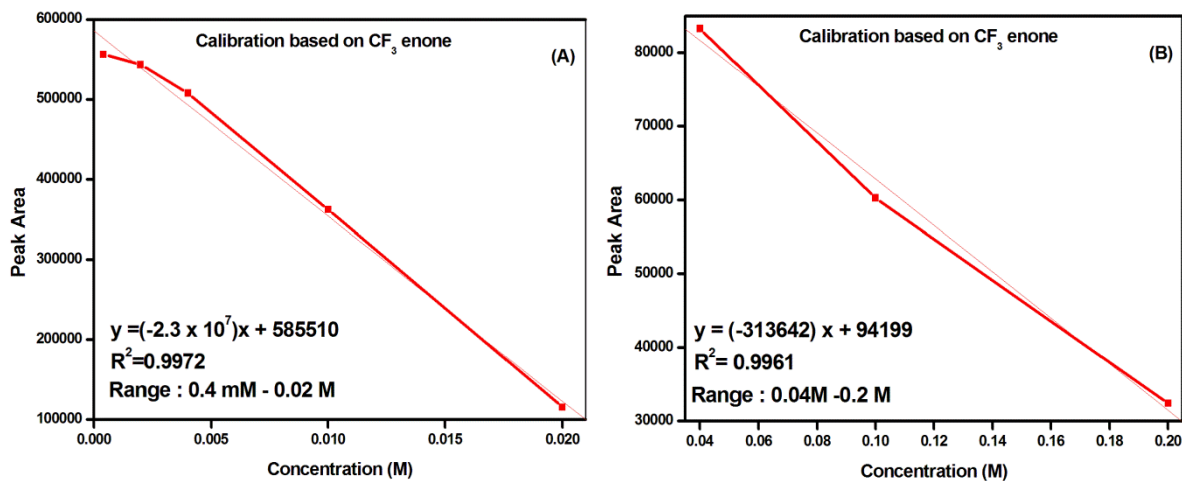

**Fig.S10.** Calibration graphs for the determination of MMH based on CF<sub>3</sub> enone in the concentration range of 0.4 mM-0.02M (A) and 0.04 M – 0.2 M (B).

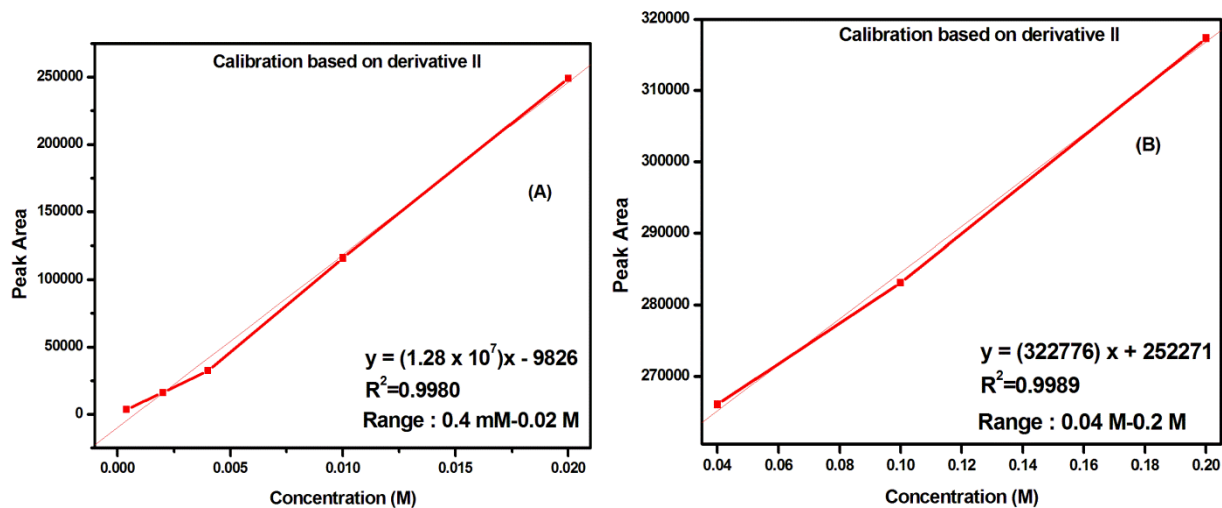

**Fig.S11.** Calibration graphs for the determination of MMH based on Pyrazoline-II (MMH derivative II) in the concentration range of 0.4 mM-0.02M (A) and 0.04 M – 0.2 M (B).

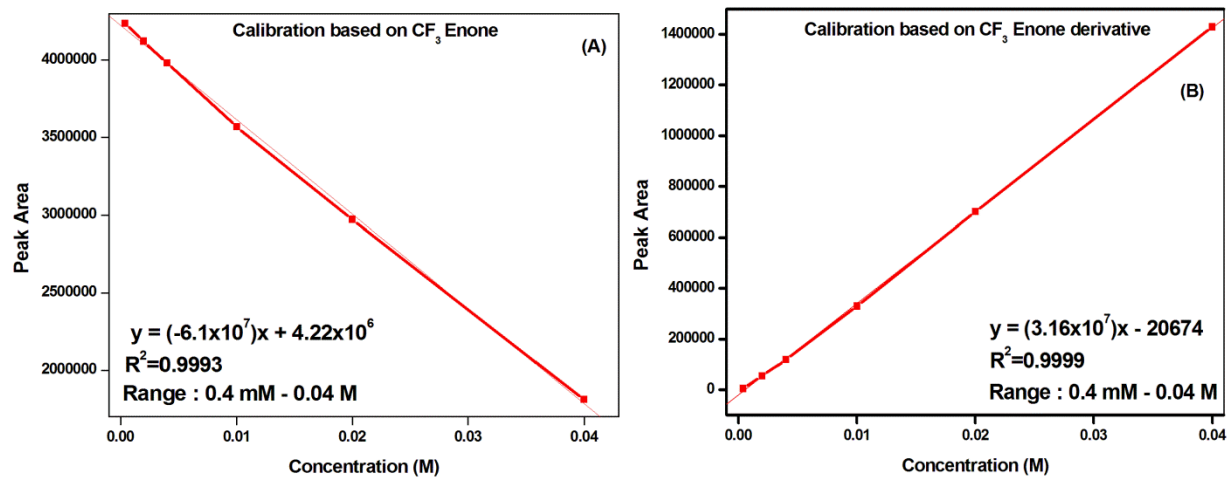

**Fig.S12.** Calibration graphs for the determination of hydrazine (in UH25) based on CF<sub>3</sub> enone (A) & UH25 derivative of CF<sub>3</sub> enone (B) in the concentration range of 0.4 mM-0.04 M.

**FP-01**

**Fragmentation pattern for CF<sub>3</sub> enone peak (R.T. - 8.6 min.)**

**CF<sub>3</sub><sup>•+</sup>**  
**68.99**

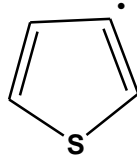

**C<sub>4</sub>H<sub>3</sub>S<sup>•+</sup>**  
**82.99**

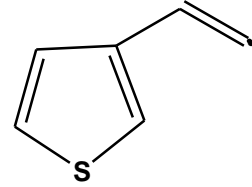

**C<sub>6</sub>H<sub>5</sub>S<sup>•+</sup>**  
**109.01**

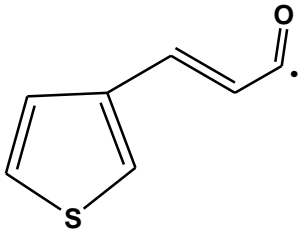

**C<sub>7</sub>H<sub>5</sub>OS<sup>•+</sup>**  
**137.01**

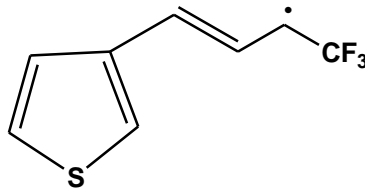

**C<sub>8</sub>H<sub>6</sub>F<sub>3</sub>S<sup>•+</sup>**  
**191.01**

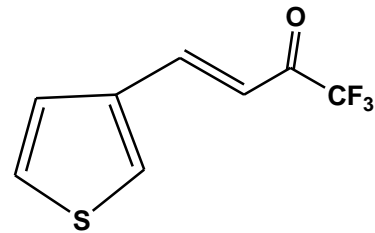

**C<sub>8</sub>H<sub>5</sub>F<sub>3</sub>OS<sup>•+</sup>**  
**m/e : 206**

**CF<sub>3</sub> enone**

**FP-02**  
**Fragmentation pattern for the peak of hydrazine derivative I**

(Pyrazoline - Retention time -11.87 min.)

**CF<sub>3</sub><sup>+</sup>**  
**68.99**

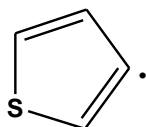

**C<sub>4</sub>H<sub>3</sub>S<sup>+</sup>**  
**82.99**

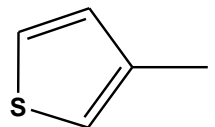

**C<sub>5</sub>H<sub>5</sub>S<sup>+</sup>**  
**97.01**

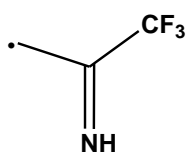

**C<sub>3</sub>H<sub>3</sub>F<sub>3</sub>N<sup>+</sup>**  
**110.02**

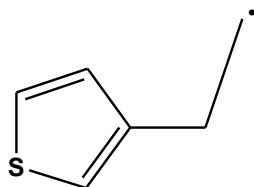

**C<sub>6</sub>H<sub>7</sub>S<sup>+</sup>**  
**111.03**

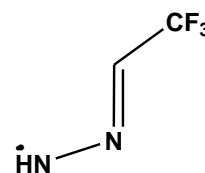

**C<sub>2</sub>H<sub>2</sub>F<sub>3</sub>N<sub>2</sub><sup>+</sup>**  
**111.02**

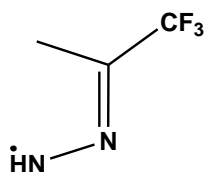

**C<sub>3</sub>H<sub>4</sub>F<sub>3</sub>N<sub>2</sub><sup>+</sup>**  
**125.03**

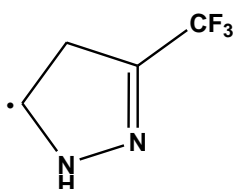

**C<sub>4</sub>H<sub>4</sub>F<sub>3</sub>N<sub>2</sub><sup>+</sup>**  
**137.03**

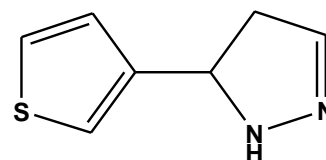

**C<sub>7</sub>H<sub>7</sub>N<sub>2</sub>S<sup>+</sup>**  
**151.03**

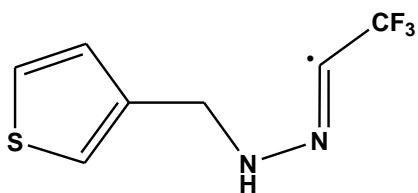

**C<sub>7</sub>H<sub>6</sub>F<sub>3</sub>N<sub>2</sub>S<sup>+</sup>**  
**207.02**

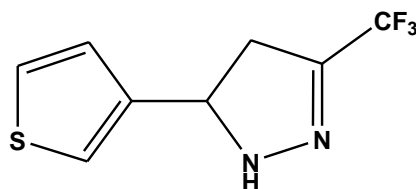

**C<sub>8</sub>H<sub>7</sub>F<sub>3</sub>N<sub>2</sub>S<sup>+</sup>**  
**m/e: 220.03**

FP-03

Fragmentation pattern for the peak of hydrazine derivative II

Pyrazolidine - (Retention time -14.06 min.)

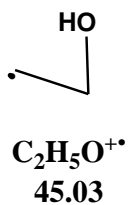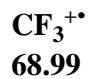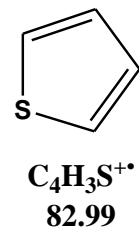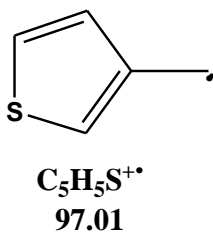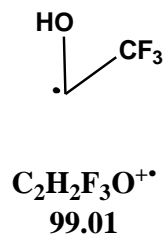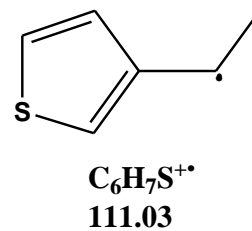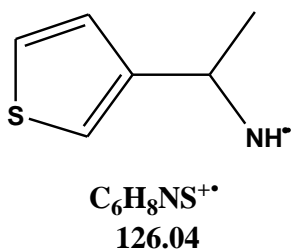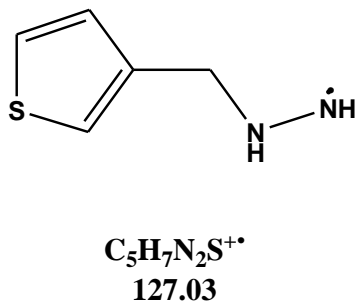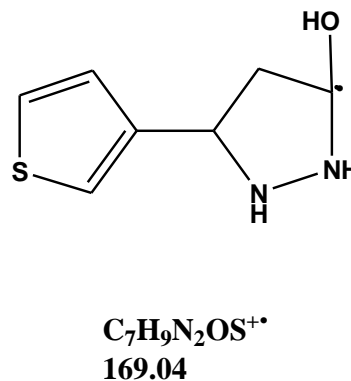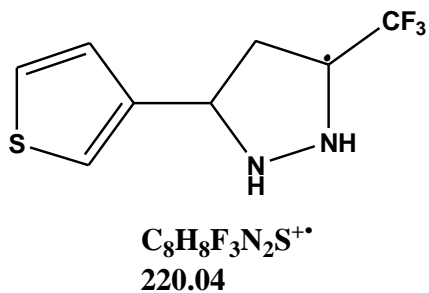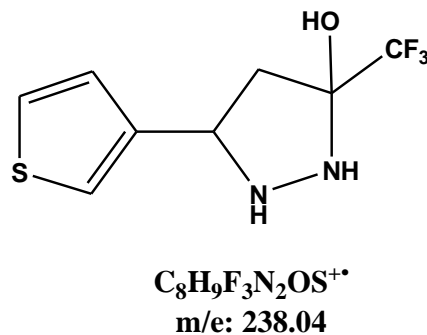

FP-04

Fragmentation pattern for the peak of derivative I of MMH

Pyrazoline-1 Retention time :10.41 min.

$\text{CF}_3^{+\bullet}$   
68.99

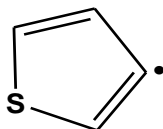

$\text{C}_4\text{H}_3\text{S}^{+\bullet}$   
82.99

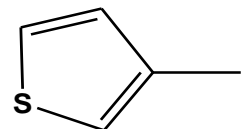

$\text{C}_5\text{H}_5\text{S}^{+\bullet}$   
97.01

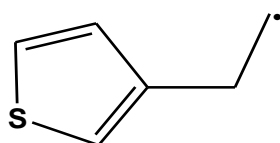

$\text{C}_6\text{H}_7\text{S}^{+\bullet}$   
111.03

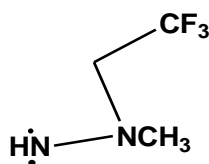

$\text{C}_3\text{H}_6\text{F}_3\text{N}_2^{+\bullet}$   
127.05

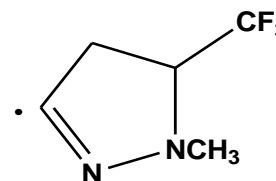

$\text{C}_5\text{H}_6\text{F}_3\text{N}_2^{+\bullet}$   
151.05

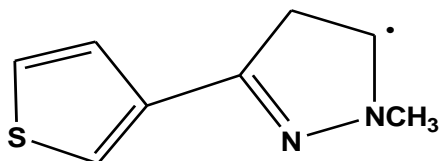

$\text{C}_8\text{H}_9\text{N}_2\text{S}^{+\bullet}$   
165.05

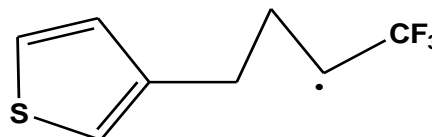

$\text{C}_8\text{H}_8\text{F}_3\text{S}^{+\bullet}$   
193.03

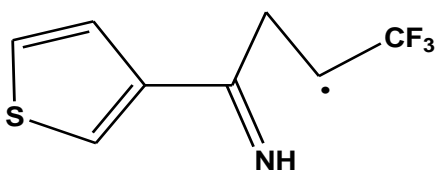

$\text{C}_8\text{H}_7\text{F}_3\text{NS}^{+\bullet}$   
206.03

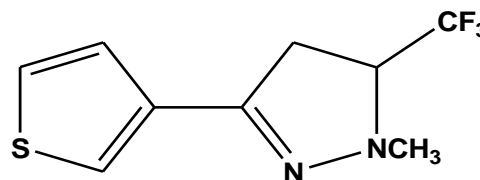

$\text{C}_9\text{H}_9\text{F}_3\text{N}_2\text{S}^{+\bullet}$   
234.04

FP-05

Fragmentation pattern for the peak of derivative II of MMH

Pyrazoline-II Retention time :12.74 min.

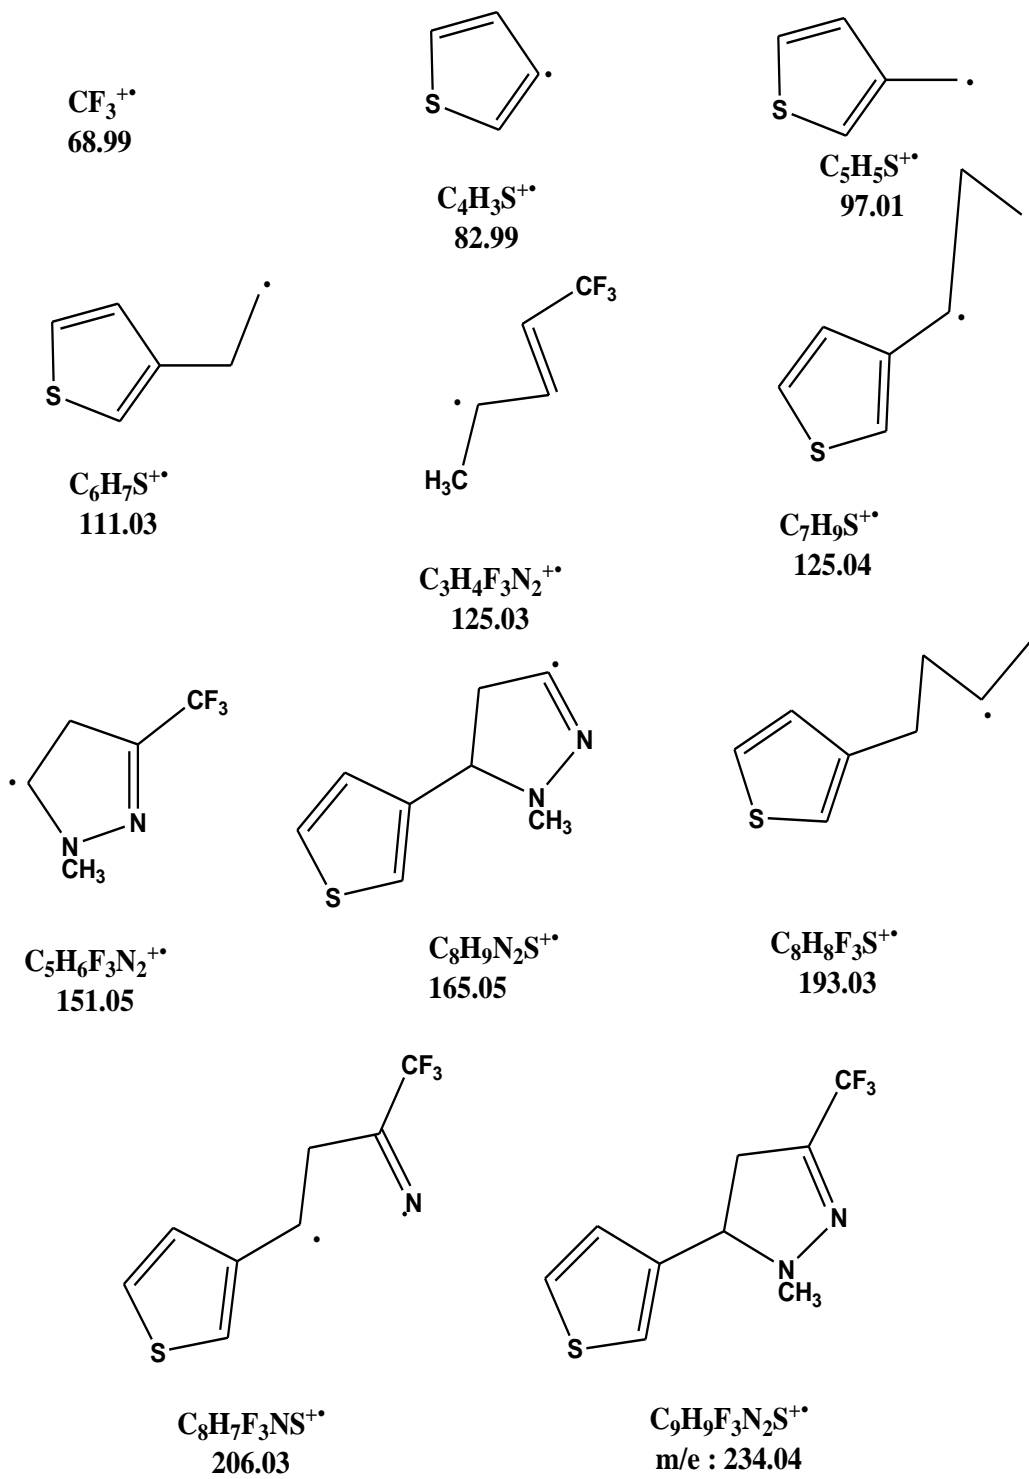

FP-06

Fragmentation pattern for the peak of MMH derivative III

Pyrazole-I-Retention time : 13.91 min

$\text{CF}_3^{+\bullet}$   
68.99

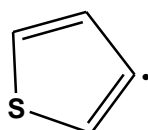

$\text{C}_4\text{H}_3\text{S}^{+\bullet}$   
82.99

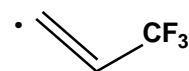

$\text{C}_3\text{H}_2\text{F}_3^{+\bullet}$   
95.01

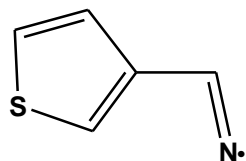

$\text{C}_5\text{H}_4\text{NS}^{+\bullet}$   
110.01

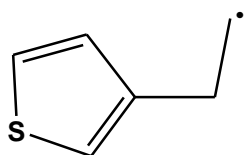

$\text{C}_6\text{H}_7\text{S}^{+\bullet}$   
111.03

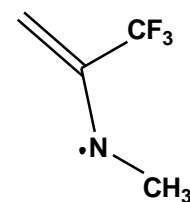

$\text{C}_4\text{H}_5\text{F}_3\text{N}^{+\bullet}$   
124.04

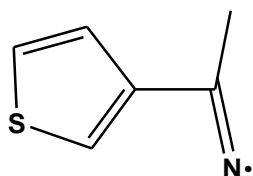

$\text{C}_6\text{H}_6\text{NS}^{+\bullet}$   
124.02

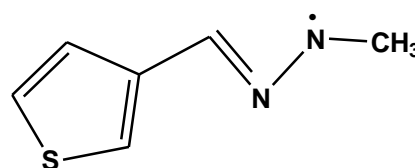

$\text{C}_6\text{H}_7\text{N}_2\text{S}^{+\bullet}$   
139.03

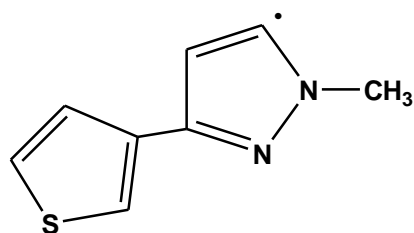

$\text{C}_8\text{H}_7\text{N}_2\text{S}^{+\bullet}$   
163.03

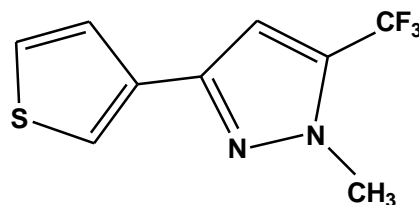

$\text{C}_9\text{H}_7\text{F}_3\text{N}_2\text{S}^{+\bullet}$   
232.03



FP-07

Fragmentation pattern for the peak of MMH derivative IV

(Pyrazole-II- Retention time - 15.80 min)

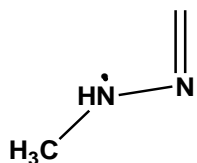

$C_2H_5N_2^{+•}$   
57.05

$CF_3^{+•}$   
68.99

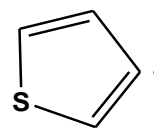

$C_4H_3S^{+•}$   
82.99

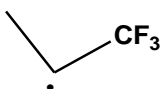

$C_3H_4F_3^{+•}$   
97.03

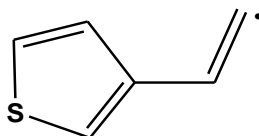

$C_6H_5S^{+•}$   
109.01

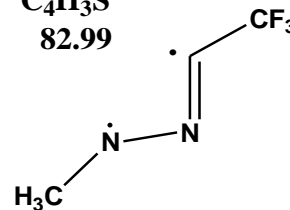

$C_3H_3F_3N_2^{+•}$   
125.02

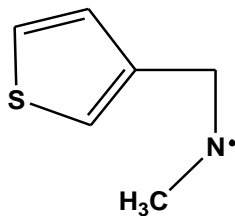

$C_6H_8NS^{+•}$   
126.04

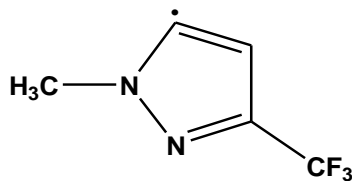

$C_5H_4F_3N_2^{+•}$   
149.03

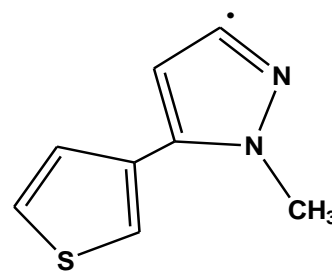

$C_8H_7N_2S^{+•}$   
163.03

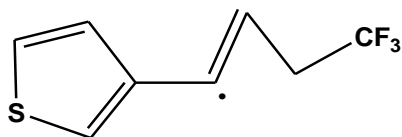

$C_8H_6F_3S^{+•}$   
181.01

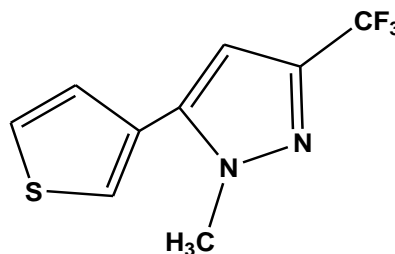

$C_9H_7F_3N_2S^{+•}$   
232.03
